# Supplementary material
Source: PubMed Central journal article supplement (PMC11005908)
Supplement: NIHMS1757608-supplement-Appendix.pdf [file NIHMS1757608-supplement-Appendix.pdf]

## Appendix I

### Focus Group Discussion Topic Guide - Health Workers

**Purpose Statement: To contextualize patient utilization and provider provision of TB education and counselling (TEC) prior to and during TB treatment**

Introductory statement

The reason we are having this FG is to find out your views, thoughts and opinions on TB education and counseling (TEC) and how it is carried out at this facility. You have been selected because you may at one point or the other provide TEC to TB patients. The information from this focus group will help us to learn from you how best to improve the provision of TEC.

I will be recording our conversation to enable me listen to it later, so that I can make notes of what we have discussed. I will not include your name in these notes and whatever information you provide today will be treated in a confidential manner. We estimate that this will take about an hour to one hour and a half.

There are no right or wrong answers and everyone is encouraged to participate. We would like to hear everyone's opinions. Do you have any questions? Can we continue?

So, I would like to begin by asking you;

1. Could you please describe how TEC is provided in this unit? (Probes: By whom, where, how often, "When? At what point in the patient flow? Are there multiple opportunities?")
2. Under what circumstances might a patient miss TEC?
3. In what ways do you think the TB program benefits from the provision of TEC? In what ways does providing TEC cost the TB program?
4. In your opinion in what ways do TB patients benefit from TEC?
5. What do you think about the quality of TEC that is currently provided in this facility? (What sort of challenges are faced in providing TEC in this facility? Does it make work for providers more difficult?)
6. In your opinion, whose responsibility should it be to provide TEC? (Why, when should it be provided?)
7. In your opinion is there a need to change the way TEC is provided in this facility? (Probes: why, how?)
8. Any questions or comments?

## Appendix II

### Focus Group Discussion Topic Guide - Patients

#### **Purpose Statement: To contextualize patient utilization and provider provision of TB education and counselling (TEC) prior to and during TB treatment**

Introductory statement.

The reason you have been chosen to participate in this FG is because you have been diagnosed with TB and we would like to find out your views, thoughts and opinions on TB education and counseling (TEC), how it is carried out at this facility and your experiences as patients who receives or should receive TEC. Patient education is when health workers provide you with information to improve your knowledge and understanding about TB treatment and counseling, provides guidance and problem-solving skills to help you to manage and complete your treatment.

The information from this focus group will help us to learn if there are any areas for improvement and how best to improve.

I will be recording our conversation to enable me listen to it later, so that I can make notes of what we have discussed. I will not include your name in these notes and whatever information you provide today will be treated in a confidential manner.

There are no right or wrong answers and everyone is encouraged to participate. We would like to hear everyone's opinions. This discussion will take about one hour.

Do you have any questions? Can we continue?

So, I would like to begin by asking you;

1. When you were diagnosed with TB, did anyone talk to you to explain TB or to provide resources to help you complete your treatment?" (Probes: "What did they say?" "Who was it?" "Where was it provided?")
2. TEC is when health workers provide you with information to improve your knowledge and understanding about TB treatment and counseling, provides guidance and problem-solving skills to help you to manage and complete your treatment. In what ways do you think this might benefit patients? Are there any ways it might put more burdens on patients? In what ways do patients benefit from TEC?
3. In your opinion did the TEC improve your understanding of the TB diagnosis? (Probe: How)
4. In your opinion, whose responsibility should it be to provide TEC?
  - Why?
  - When should they do it?
5. In your opinion is there a need to change the way TEC is provided to TB patients? (Probes, why, how?)
6. Any questions or comments?
